# Supplementary material for: Fat Grafting Subjectively Improves Facial Skin Elasticity and Hand Function of Scleroderma Patients
Source: PubMed Central journal article supplement — Plast Reconstr Surg Glob Open. 2021 Jan 25;9(1):e3373. doi: 10.1097/GOX.0000000000003373 (PMC7861649; doi:10.1097/gox.0000000000003373), 2021-01-25
Supplement: gox-9-e3373-s001.pdf [file gox-9-e3373-s001.pdf]

**Supplemental Digital Content 1. Study Patients.**

| Patient no. | Age (Years) | Sex | Past Medical History                                                                            | Smoking History | Diagnosis prior to fat grafting (Years) | Medications                                                     |
|-------------|-------------|-----|-------------------------------------------------------------------------------------------------|-----------------|-----------------------------------------|-----------------------------------------------------------------|
| 1           | 52          | F   | 1. ILD<br>2. Pulmonary HTN                                                                      | Former (10PY)   | 27                                      | 1. Revatio                                                      |
| 2           | 78          | F   | 1. Osteoarthritis<br>2. HTN<br>3. Anxiety<br>4. CKD<br>5. Pulmonary HTN                         | Former (10 PY)  | 11                                      | 1. None (intolerant of medications)                             |
| 3           | 48          | F   | 1. Hypothyroidism<br>2. GERD<br>3. Pulmonary HTN<br>4. Osteoarthritis                           | Never           | 28                                      | 1. Revatio                                                      |
| 4           | 52          | F   | 1. Sjogren's disease                                                                            | Never           | 32                                      | 1. Cevimeline<br>2. Montelukast                                 |
| 5           | 60          | F   | 1. Osteoarthritis<br>2. GERD<br>3. Esophageal dysmotility<br>4. ILD<br>5. Raynaud's disease     | Never           | 13                                      | 1. Prednisone                                                   |
| 6           | 28          | F   | 1. Esophageal dysmotility<br>2. ILD<br>3. Raynaud's disease<br>4. Nephrolithiasis               | Never           | 10                                      | 1. Revatio<br>2. Cellcept<br>3. Nifedipine                      |
| 7           | 62          | F   | 1. Hypothyroidism<br>2. Ulcerative colitis<br>3. Squamous cell carcinoma<br>4. Depression       | Former (12.5PY) | 41                                      | 1. None (intolerant of medications)                             |
| 8           | 25          | F   | 1. None                                                                                         | Never           | 8                                       | 1. Methotrexate<br>2. Montelukast                               |
| 9           | 57          | F   | 1. Fibromyalgia<br>2. ILD<br>3. Raynaud's disease<br>4. GERD<br>5. Depression<br>6. Hypothyroid | Former (5PY)    | 8                                       | 1. Cellcept                                                     |
| 10          | 25          | F   | 1. Raynaud's disease<br>2. Depression/ anxiety<br>3. Hypothyroid                                | Former (1.75PY) | 9                                       | 1. Methotrexate<br>2. Plaquenil<br>3. Cellcept<br>4. Sildenafil |
| <i>Avg</i>  | <i>48.7</i> |     |                                                                                                 |                 |                                         |                                                                 |

ILD, interstitial lung disease; HTN, hypertension; CKD, chronic kidney disease; GERD, gastroesophageal reflux disease; PY, pack year.
