# Supplementary material for: Fat Grafting Subjectively Improves Facial Skin Elasticity and Hand Function of Scleroderma Patients
Source: PubMed Central journal article supplement — Plast Reconstr Surg Glob Open. 2021 Jan 25;9(1):e3373. doi: 10.1097/GOX.0000000000003373 (PMC7861649; doi:10.1097/gox.0000000000003373), 2021-01-25
Supplement: gox-9-e3373-s002.pdf [file gox-9-e3373-s002.pdf]

**Supplemental Digital Content 2. Volume of Fat Injected to the Face and Hand.**

| Patient no. | Fat Grafting Session | Donor Site      | Volume Injected into the Face (cc) per session |            |                   |               |                  | Volume injected into Bilateral Hand (cc) | No. of Treatments | Follow Up (months) |
|-------------|----------------------|-----------------|------------------------------------------------|------------|-------------------|---------------|------------------|------------------------------------------|-------------------|--------------------|
|             |                      |                 | Total                                          | Lips       | Naso-labial Folds | Malar Regions | Marionette Lines |                                          |                   |                    |
| 1           | 1                    | Abdomen         | 36                                             | 6          | -                 | 30            | -                | -                                        | 1                 | 3                  |
| 2           | 1                    | Abdomen         | 17.5                                           | 8.5        | 3                 | 6             | -                | -                                        | 1                 | 4                  |
| 3           | 1                    | Thighs          | 7.5                                            | 7.5        | -                 | -             | -                | 48                                       | 4                 | 1                  |
|             | 2                    | Abdomen         | 8.5                                            | 8.5        | -                 | -             | -                | 62                                       |                   |                    |
|             | 3                    | Abdomen, Thighs | 27                                             | 9          | -                 | 18            | -                | 78                                       |                   |                    |
|             | 4                    | Thighs          | 21 <sup>a</sup>                                | 8          | -                 | 10            | -                | 40                                       |                   |                    |
| 4           | 1                    | Abdomen         | 9                                              | 9          | -                 | -             | -                | 1                                        | 35                |                    |
| 5           | 1                    | Thighs          | 34                                             | 6          | -                 | 24            | 4                | 70                                       | 2                 | 10                 |
|             | 2                    | Thighs          | 35                                             | 7          | -                 | 18            | 10               | 50                                       |                   |                    |
| 6           | 1                    | Thighs          | 18                                             | 6          | -                 | 10            | 2                | 30                                       | 1                 | 2                  |
| 7           | 1                    | Thighs          | 71                                             | 20         | -                 | 40            | 11               | -                                        | 4                 | 2                  |
|             | 2                    | Abdomen, Thighs | 30                                             | 10         | -                 | 20            | -                | -                                        |                   |                    |
|             | 3                    | Thighs          | 39                                             | 9          | 6                 | 19            | 6                | -                                        |                   |                    |
|             | 4                    | Abdomen         | 17                                             | 3          | 6                 | 8             | -                | -                                        |                   |                    |
| 8           | 1                    | Abdomen         | 10 <sup>b</sup>                                | -          | -                 | -             | -                | -                                        | 1                 | 4                  |
| 9           | 1                    | Abdomen         | 45                                             | 8          | 8                 | 6             | 23 <sup>c</sup>  | 41                                       | 1                 | 0.5                |
| 10          | 1                    | Abdomen         | 18                                             | 6          | -                 | 12            | 1                | 60                                       | 1                 | 0.5                |
| <i>Avg</i>  |                      |                 | <i>26.1</i>                                    | <i>8.2</i> | <i>5.2</i>        | <i>17.0</i>   | <i>8.1</i>       | <i>53.2</i>                              | <i>1.7</i>        | <i>6.2</i>         |

<sup>a</sup>3 cc to chin

<sup>b</sup>7 cc to central forehead, 3cc to scalp

<sup>c</sup>23 cc to marionette and chin (volume not identified separately)
