# Supplementary figures and images for: Fat Grafting Subjectively Improves Facial Skin Elasticity and Hand Function of Scleroderma Patients
Source: PubMed Central journal article supplement — Plast Reconstr Surg Glob Open. 2021 Jan 25;9(1):e3373. doi: 10.1097/GOX.0000000000003373 (PMC7861649; doi:10.1097/gox.0000000000003373), 2021-01-25

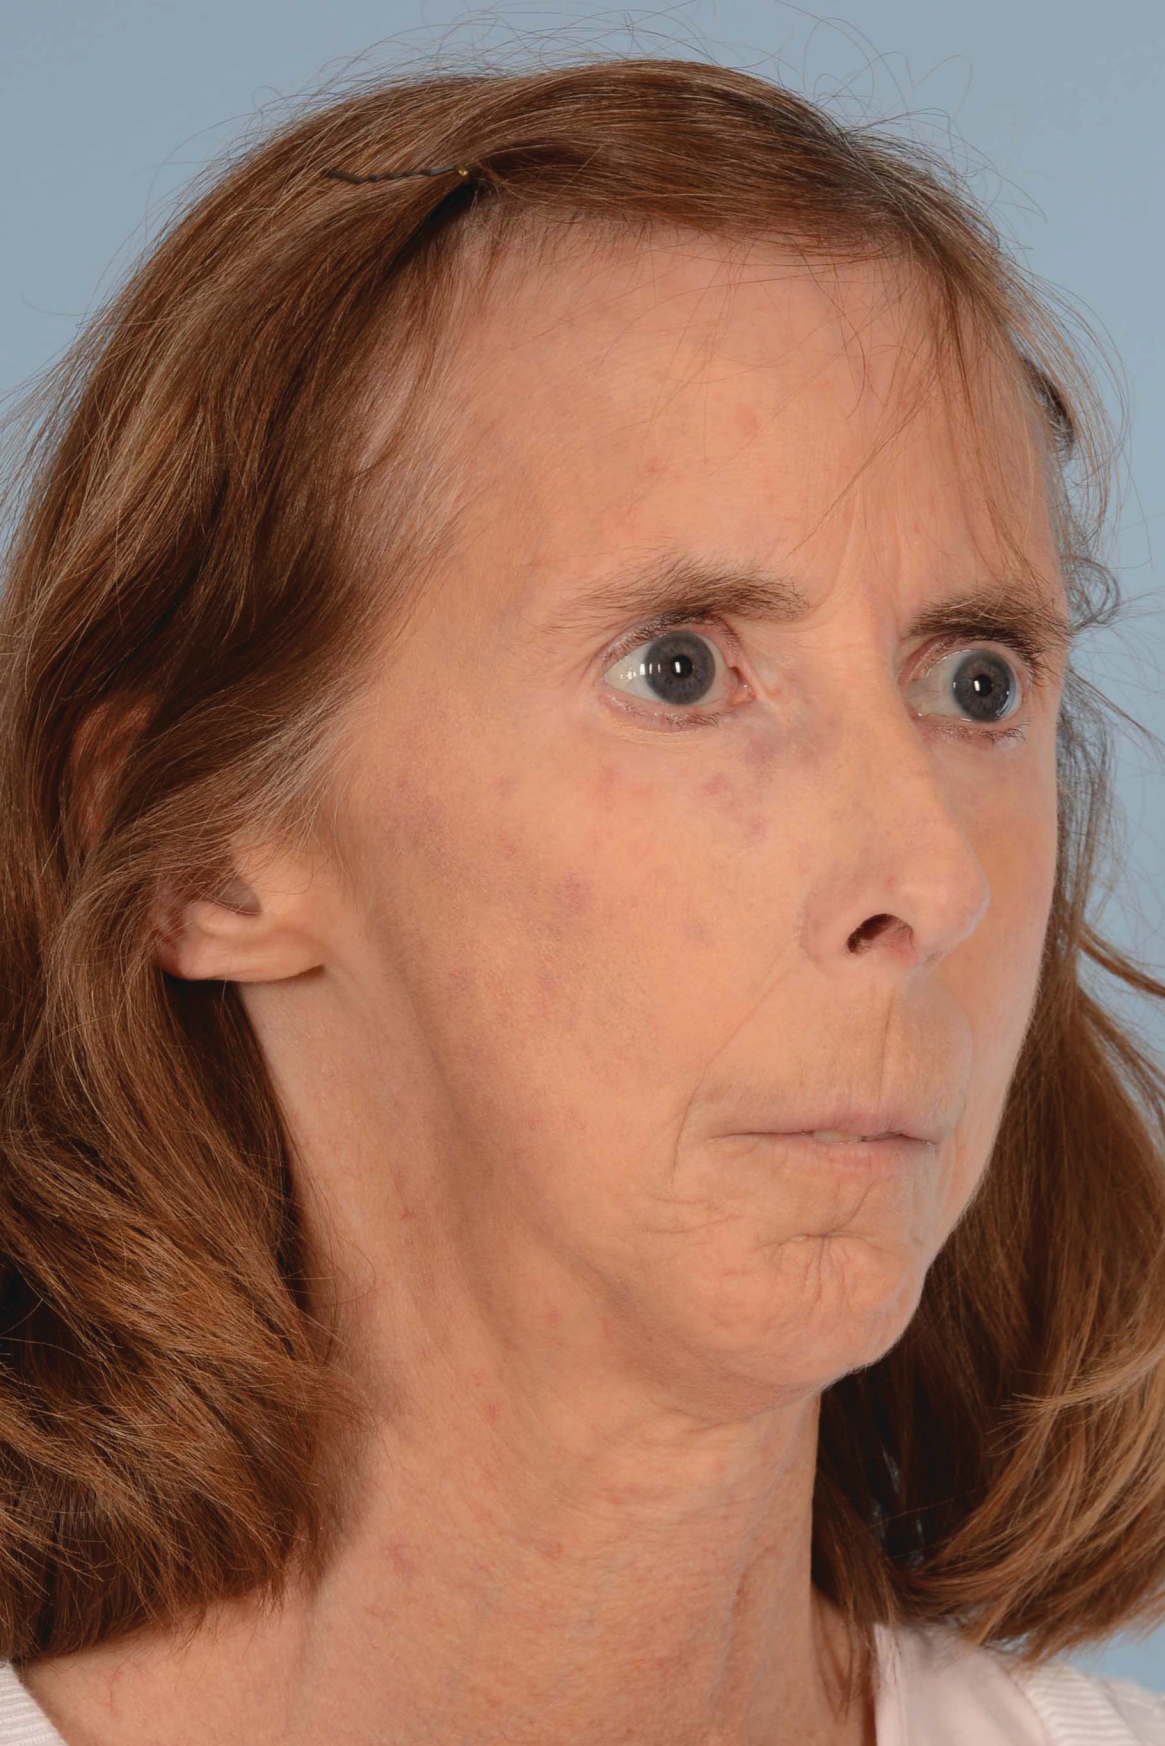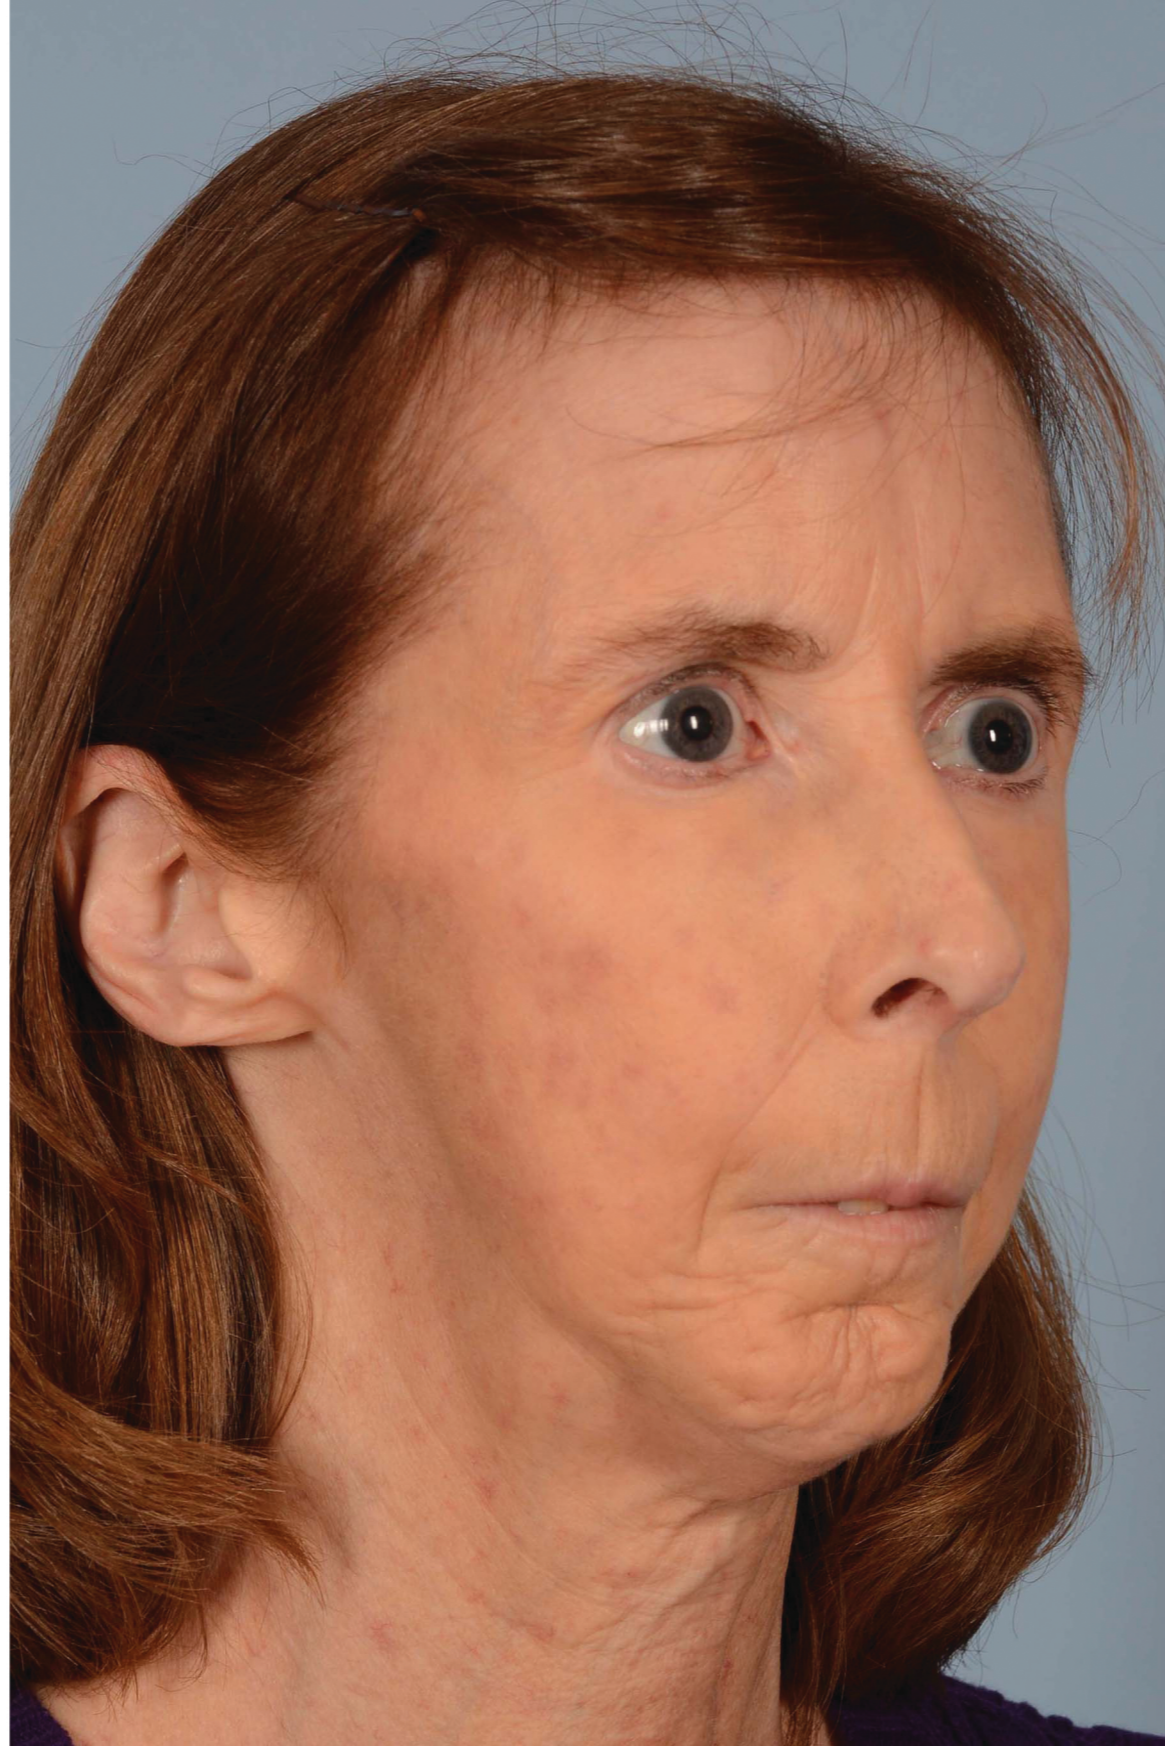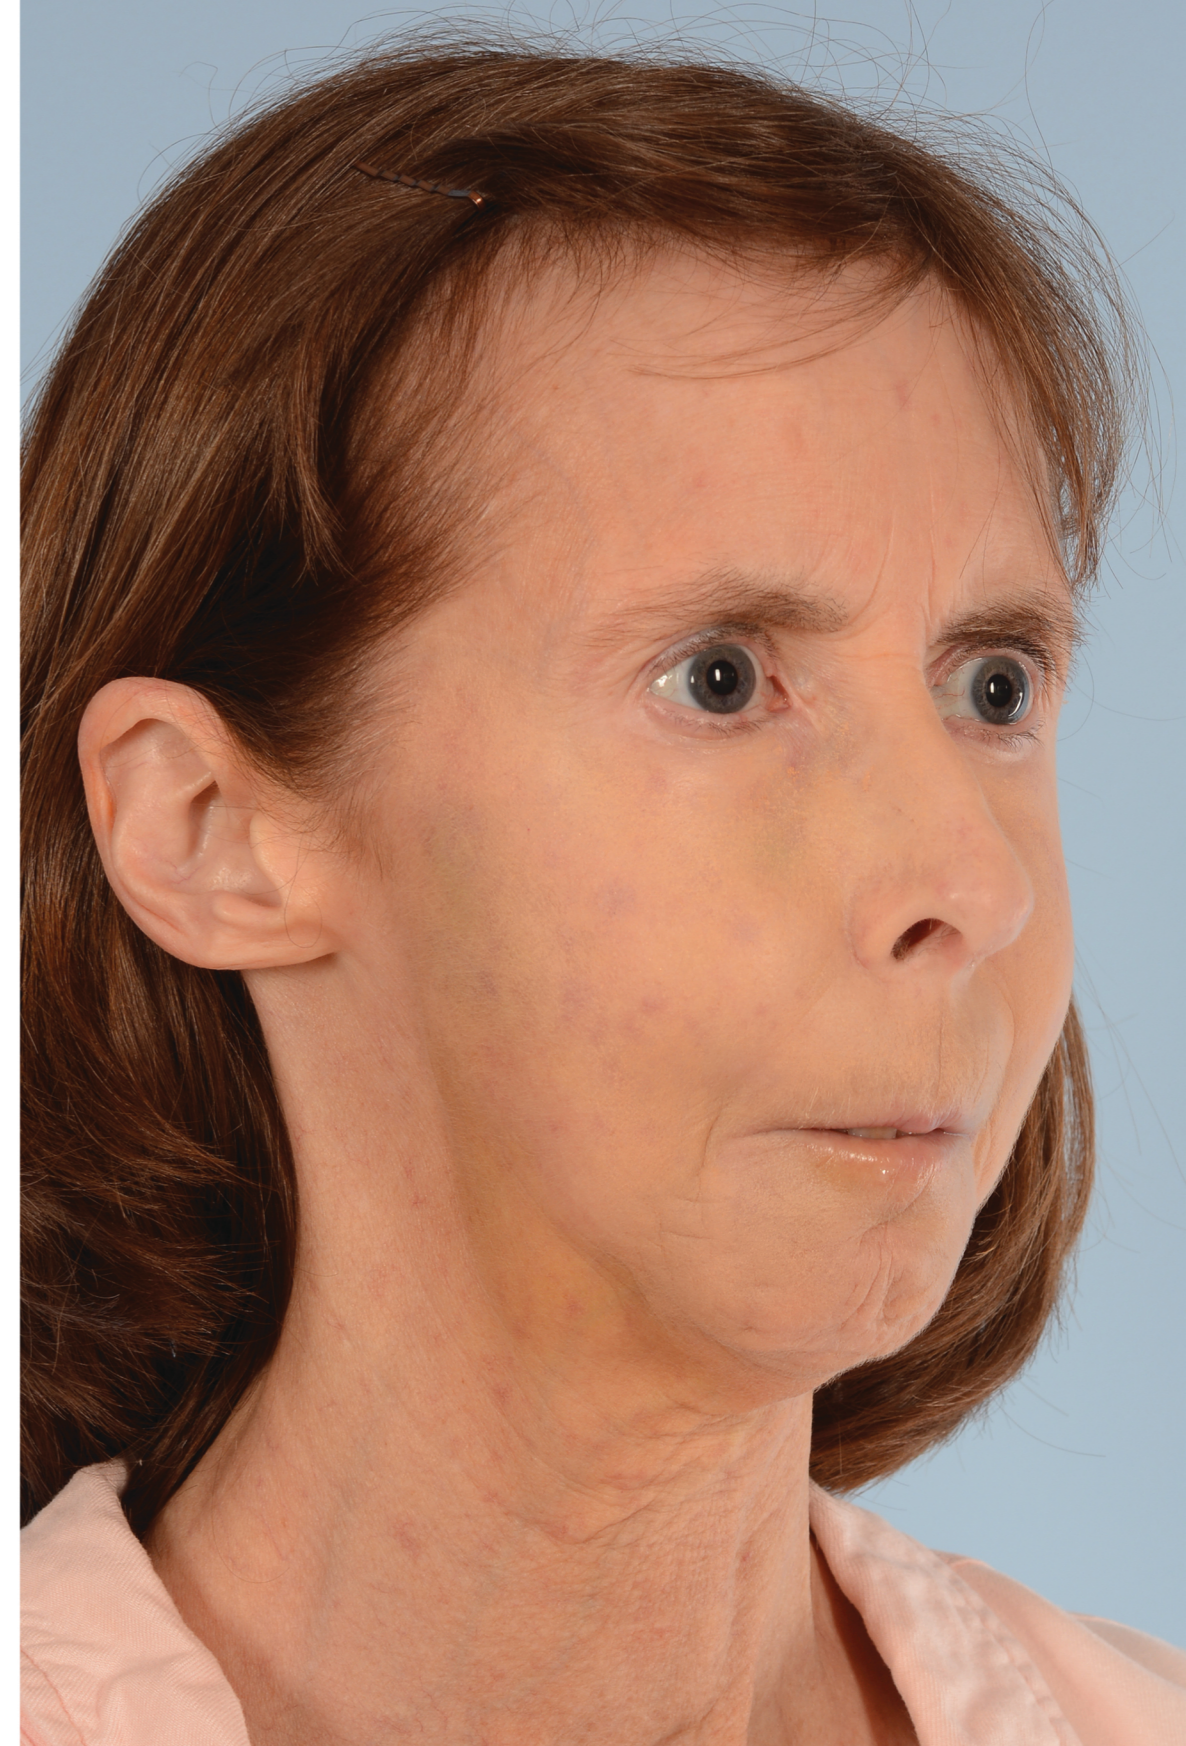

Supplement: gox-9-e3373-s003.pdf [file gox-9-e3373-s003.pdf]

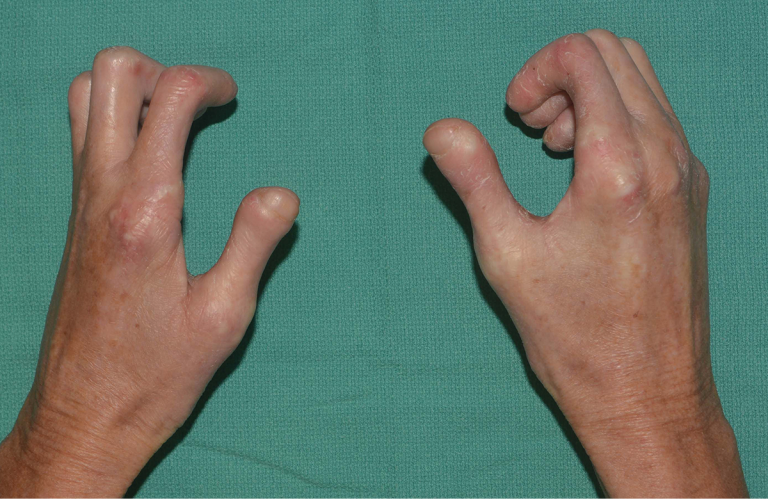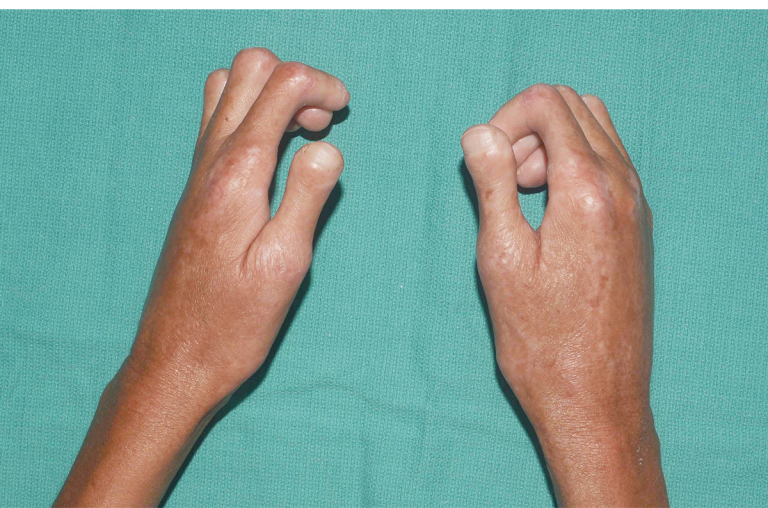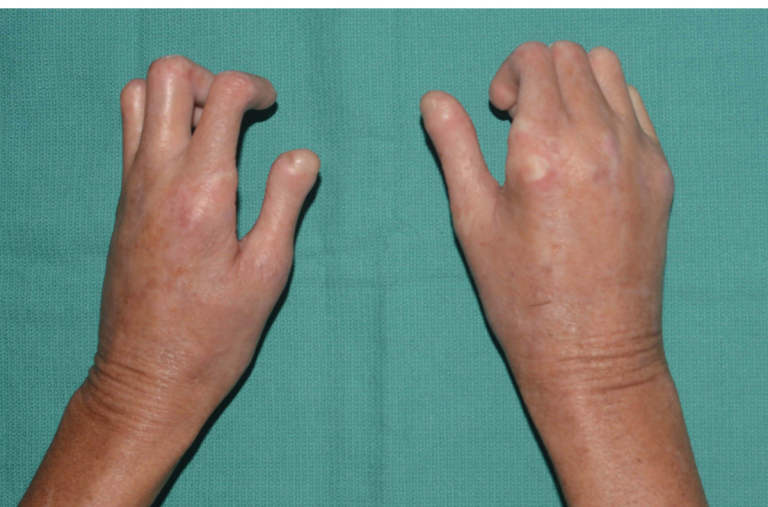

Supplement: gox-9-e3373-s004.pdf [file gox-9-e3373-s004.pdf]
